# Supplementary material
Source: Springer Nature journal article supplement (https://www.springermedizin.de/resource/supplementary/12879_2011_2060_MOESM1_ESM.pdf/9443596)

### Estimated incidence of HPV16/18-related cervical cancer

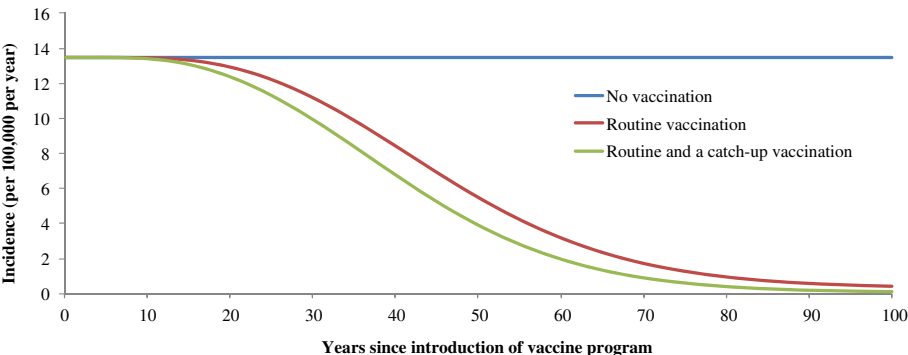

### Estimated incidence of HPV16/18-related CIN2/3

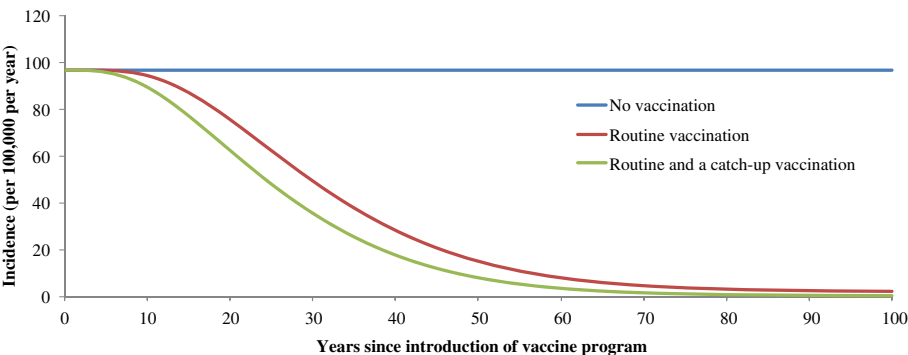

### Estimated incidence of HPV6/11-related genital warts among females

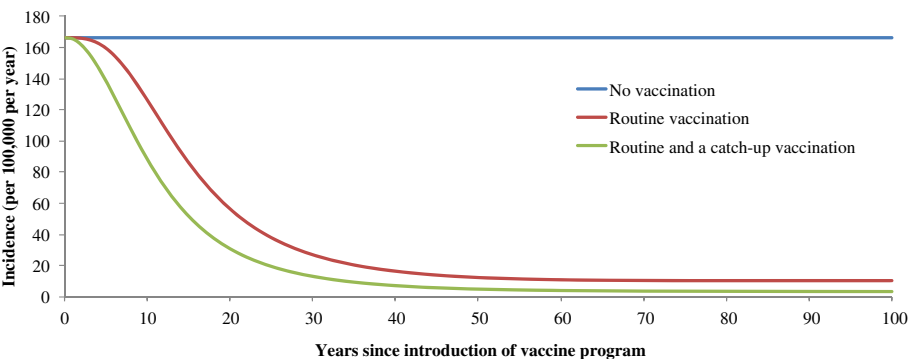

### Estimated incidence of HPV6/11-related genital warts among males

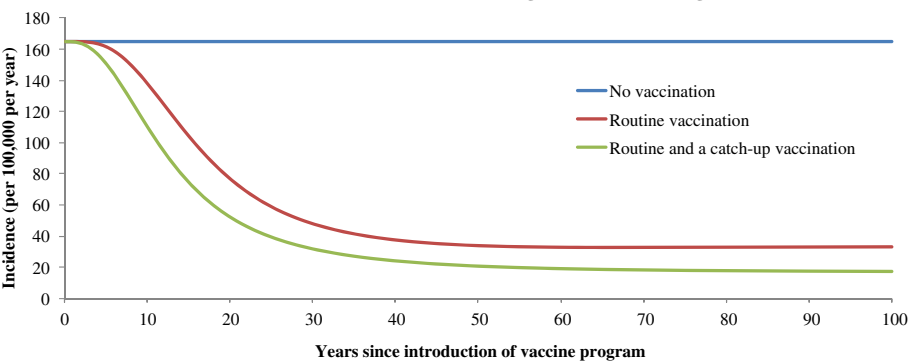

Supplement: MOESM1 [file 9443596]
